# Supplementary material for: A branching model of lineage differentiation underpinning the neurogenic potential of enteric glia
Source: PubMed Central journal article supplement (PMC10516949; doi:10.1038/s41467-023-41492-3), 2023-09-22
Supplement: 41467_2023_41492_MOESM3_ESM.pdf [file 41467_2023_41492_MOESM3_ESM.pdf]

## Description of Additional Supplementary Files

### **Supplementary data 1 – Statistics for the comparison of the glial and random trajectories**

Results of two-sided Wilcoxon signed-rank test comparing mean spherical distances for 1000 paths sampled from the glial trajectory in comparison to 1000 random trajectories.

### **Supplementary data 2 – Statistics for the comparison of the neuronal and random trajectories.**

Results of two-sided Wilcoxon signed-rank test comparing mean spherical distances for 1000 paths sampled from the neuronal trajectory in comparison to 1000 random trajectories.

### **Supplementary data 3 – Statistics for the comparison of the neuronal and glial trajectories**

Results of two-sided Mann-Whitney U test comparing mean spherical distances for 1000 paths sampled from the neuronal trajectory in comparison to 1000 paths sampled from the glial trajectory.

### **Supplementary data 4 – Gene modules**

Gene modules identified using the Antler algorithm (<https://github.com/juliendelile/Antler>).

### **Supplementary data 5 – Csde1 binding sites**

Csde1 binding sites identified using a script published by Moore et al., 2018.

### **Supplementary data 6 – Csde1 binding site statistics**

Results of one-sided permutation testing to assess the enrichment of gene modules in Csde1 binding sites.

### **Supplementary data 7 – Csde1 knockdown statistics**

Results of two-sided Fisher exact test to determine whether gene modules are biased towards genes which are up- or down-regulated upon Csde1 knockdown. Data on CSDE1 knockdown in hESCs taken from Ju Lee et al., 2017.

### **Supplementary data 8 – Csde1 iCLIP statistics**

Results of one-sided hypergeometric test to determine whether gene modules are enriched in RNA targets of Csde1. Data on Csde1 targets taken from Wurth et al., 2016 (iCLIP-seq data in human melanoma).

### **Supplementary data 9 – ANCC motifs**

Motifs enriched in peaks more accessible ( $\log_{2}FC \geq 1$ ,  $p_{adj} \leq 0.01$ ) in ANCCs (one-sided hypergeometric test).

### **Supplementary data 10 – EGC motifs**

Motifs enriched in peaks more accessible ( $\log_{2}FC \geq 1$ ,  $p_{adj} \leq 0.01$ ) in EGCs (one-sided hypergeometric test).

**Supplementary data 11 – Contingency table**

Contingency table used for testing whether gene modules are biased towards genes which are up- or down-regulated upon Csde1 knockdown (Fisher exact test).
